# Supplementary material
Source: Royal Society of Chemistry journal article supplement (doi:10.1039/d6gc01654e)
Supplement: d6gc01654e1.pdf [file d6gc01654e1.pdf]

## Supporting Information

### **Water-mediated fabrication of reprocessable and self-healing cellulose-based polyimine plastics**

Yumei Chen,<sup>1,2</sup> Chunhui Xie,<sup>1,2</sup> Tao Wu,<sup>1,2</sup> Tianlong He,<sup>1,2</sup> Haibo Xie,<sup>\*1,2</sup> Yuanlong Guo<sup>\*1,2</sup>

<sup>1</sup>Department of Polymer Materials and Engineering, College of Materials and Metallurgy, Guizhou University, Guiyang 550025, China.

<sup>2</sup>Technology Innovation Center for High-Efficiency Utilization of Bamboo-Based Biomass in Guizhou Province, Guiyang 550025, China.

\*Corresponding authors.

E-mail addresses:

Haibo Xie: [hbxie@gzu.edu.cn](mailto:hbxie@gzu.edu.cn)

Yuanlong Guo: [ylguo@gzu.edu.cn](mailto:ylguo@gzu.edu.cn)

Includes,

1. Supplementary methods
2. Supplementary figures and tables (Fig. S1-S4 and Tables S1-S13)
3. Supplementary references

## 1. Supplementary methods

### (1) The preparation of CLE

Cellulose levulinate ester (CLE) was prepared following our prior work.<sup>1</sup> Typically, following a specific ratio, MCC (10 g, 0.185 mol OH), DMSO (154 g) and DBU (28 g, 0.184 mol) were weighed and added to a 400 mL high-pressure reaction vessel. CO<sub>2</sub> was slowly introduced until reaching 1 MPa, followed by a gradual release. This process was repeated three times to exchange gases in both the reaction vessel and the solution. Finally, CO<sub>2</sub> was introduced until the pressure stabilized at 1.5 MPa. The reaction solution was heated to 50 °C and mechanically stirred for 3 h to obtain a 5 wt% homogeneous and transparent cellulose solution. Next,  $\alpha$ -AL (45.4 g, 0.463 mol, molar ratio: -OH/ $\alpha$ -AL = 1/2.5) was slowly added into the 5 wt% cellulose solution in a flask, the reaction solution was heated up to 120 °C for 1 h under mechanical stirring. After completion of the reaction, the reaction solution was slowly poured into isopropanol (400 mL) to precipitate the product. The product was collected by filtration and repeatedly washed with isopropanol (100 mL  $\times$  2). Finally, the obtained CLE (DS = 0.63) was dried under vacuum at 60 °C for 48 h, affording 12.5 g of product.

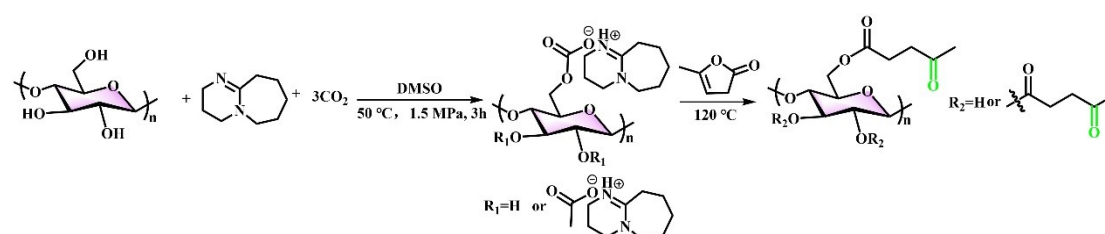

**Scheme S1.** The preparation process of CLE (DS = 0.63).

The DS of CLE was calculated according to the following equation:

$$DS = \frac{I_{Methyl} \times 7}{I_{AGU} \times 3} \quad \#(1)$$

Where  $I_{Methyl}$  represents the integration value of the terminal methyl group and  $I_{AGU}$  represents the integration value of the cellulose structural units.

### (2) Preparation of regenerated DMSO cellulose film

MCC (5 g, 0.093 mol OH), DMSO (77 g) and DBU (14 g, 0.092 mol) were weighed accurately and sequentially transferred into a high-pressure vessel equipped with mechanical stirring and temperature control. The vessel was purged with CO<sub>2</sub> by three pressurization and vent cycles to remove air, then pressurized with CO<sub>2</sub> to 1.5 MPa and

held at this pressure. The mixture was heated to 50 °C and stirred for 3 h until a clear cellulose solution with a concentration of 5 wt% was obtained. The homogeneous cellulose solution was uniformly cast onto a 60 mm glass Petri dish and immediately immersed in ethanol to form a hydrogel film, followed by washing with ethanol to remove residual solvent. The gel films were dried in an oven at 30 °C to obtain regenerated cellulose films.

### **(3) Self-healing of the CPP**

The surface of CPP-Ph was first scratched by a metal blade and hot-pressed at 180 °C and 15 MPa for 60 minutes when sandwiched between two pieces of polyimide membrane.

### **(4) Reprocessing process of the CPP**

The CPP-Ph was ground into powder and sandwiched between two pieces of polyimide membrane. After the hot-pressing at 130 °C and 15 MPa for 30 minutes, the remolded CPP-Ph was obtained.

### **(5) Water contact angle, hygroscopicity and durability tests**

First, 5 µL of pure water was dropped on the surface of CPP and regenerated cellulose film, then the contact angle changing with time was recorded. The hygroscopicity of the samples was determined by immersing them in water for predetermined durations and subsequently measuring the weight gain. For the durability test, the CPP-Ph were immersed into water and various organic solvents for a month to observe their shape stability. The detailed materials and methods for regenerating cellulose film are available in the Supplementary Materials.

### **(6) Chemical degradability and biodegradability tests**

An amine-catalyzed degradation method was employed to evaluate chemical degradability. Specifically, CPP-Ph film (20 × 5 mm) was immersed in 6 mL of a 5 wt% aqueous solution of 1,3-bis(aminomethyl)benzene with magnetic stirring at 80 °C

for 10 h. For the biodegradability test, CPP-Ph films were cut into 15 × 15 mm square pieces and buried in natural soil at a depth of 10 cm. The samples were periodically retrieved for observation, and their weight changes over time were recorded.

## (7) Green chemistry metrics

The green chemistry metrics were evaluated based on the following parameters.

### (a) Atom economy (AE)

AE is a measure of the efficiency of a chemical reaction, indicating the extent to which atoms from the reactants are incorporated into the desired product.<sup>2, 3</sup> The ideal value of AE factor is 100% (all atoms from the starting materials reside in the product). The atom economy values of CLE and CPP samples were calculated according to the equation (2):

$$AE (\%) = \frac{\text{Molecular weight of the product}}{\sum \text{Molecular weight of reactants}} \times 100 \quad (2)$$

The diamine monomers used for preparing CPP-Ph, CPP-C5, and CPP-C10 were 1,3-bis(aminomethyl)benzene (136.19 g/mol), 1,5-diaminopentane (102.18 g/mol), and 1,10-diaminodecane (172.31 g/mol), respectively.

### (b) Environmental factor (*E*-factor) and process mass intensity (PMI) analysis

R. A. Sheldon has proposed the *E*-factor to quantify the sustainability of a process.<sup>4-6</sup> The *E*-factor was calculated based on the mass of waste generated, with recovery rates of 87.0% for DBU, 96.2% for DMSO, and 92.4% for *i*-PrOH adopted from a related DBU/DMSO/CO<sub>2</sub> solvent system.<sup>7</sup> The *E*-factors of the CPP samples were calculated according to the equation (3):

$$E - \text{factor} = \frac{\sum m (\text{raw materials}) + \sum m (\text{spent reagents}) + \sum m (\text{solvent losses})}{m (\text{product})}$$

PMI is defined as the total mass of all materials used in a process divided by the mass of the product.<sup>8,9</sup> The PMI values of the CPPs were calculated according to the equation (4):

$$PMI = \frac{\sum m (\text{raw materials}) + \sum m (\text{reagents}) + \sum m (\text{solvent})}{m (\text{product})} \quad (4)$$

The amount of CO<sub>2</sub> in step 1 was estimated using the ideal gas law:

$$n(\text{CO}_2) \approx 3 \times \frac{P_1 V}{RT} + \frac{P_2 V}{RT} \quad (5)$$

Where  $P_1$  is 1 MPa,  $P_2$  is 1.5 MPa,  $V$  is 400 mL,  $R$  is 8.314 J mol<sup>-1</sup> K<sup>-1</sup>, and  $T$  is 298.15 K. The calculation was based on a representative batch using 10 g of MCC. For other batch sizes, the CO<sub>2</sub> amount was scaled proportionally according to the MCC mass.

### (c) Biorenewable carbon (BRC) content

BRC content refers to the percentage of carbon derived from biorenewable resources relative to the total carbon content of the material.<sup>10, 11</sup> The BRC values of the CPP samples were calculated according to the equation (6):

$$\text{BRC (\%)} = \frac{\text{Biosourced carbon}}{\text{Biosourced carbon} + \text{Fossil carbon}} \times 100 \quad (6)$$

In this calculation, 1,5-diaminopentane and 1,10-diaminodecane were treated as bio-based, whereas 1,3-bis(aminomethyl)benzene was treated as fossil-based.

### (d) Energy consumption

The energy consumption of each processing step was estimated based on the rated power of the laboratory equipment and the corresponding operating time,<sup>12, 13</sup> as follows:

$$E = \sum (P_i \times t_i) \quad (7)$$

Where  $E$  is the total energy consumption,  $P_i$  is the rated power of each laboratory device, and  $t_i$  is the corresponding operating time. The reported values are laboratory-scale estimates based on a representative batch using 10 g of cellulose as the starting material and were not normalized to the mass of the final product, because such normalization would substantially overestimate the specific energy consumption under low equipment loading conditions, particularly during the prolonged oven-drying step.



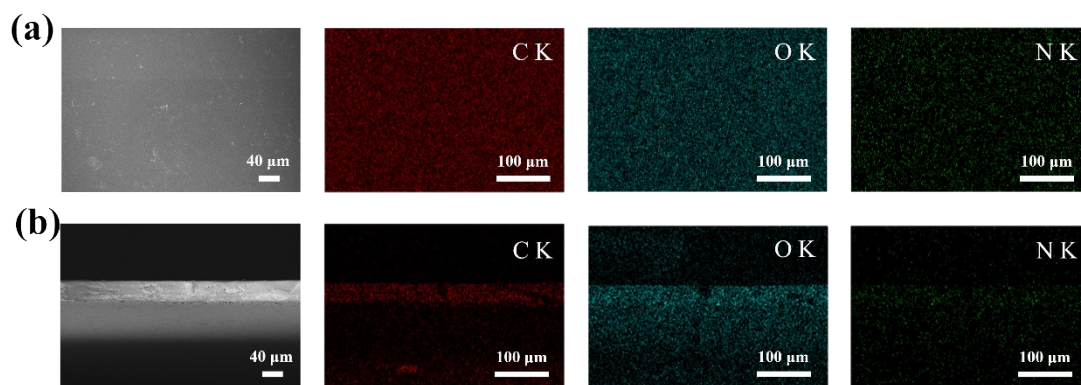

**Fig. S3** (a) SEM images of the surface and EDS mapping images of C, O, N element at the surface for CPP-Ph film, (b) SEM images of the cross section and EDS mapping images of C, O, N element at the cross section for CPP-Ph film.

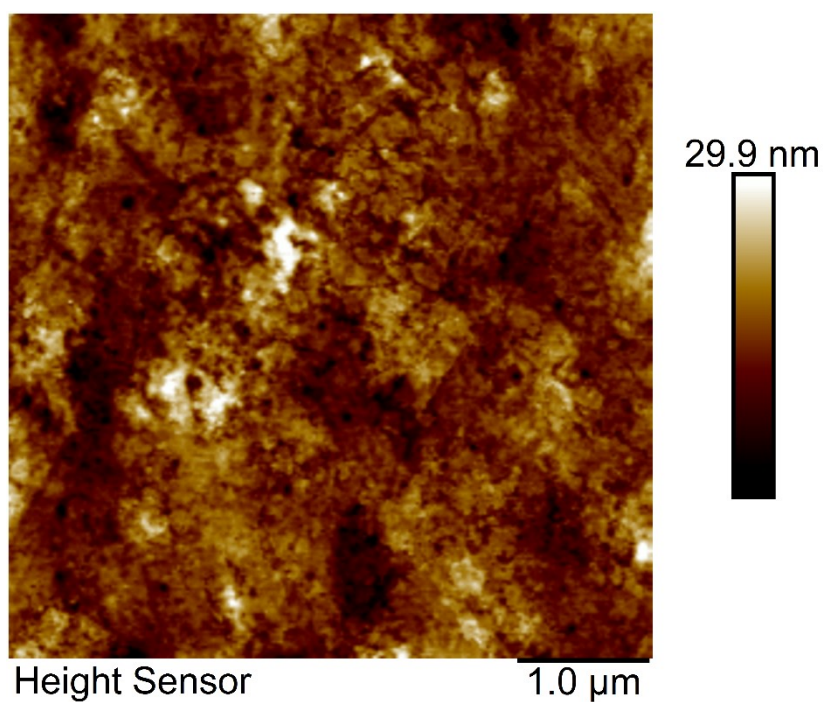

**Fig. S4** 2D AFM image of CPP-Ph film surface.

**Table S1** Comparison of the tensile strength and Young's modulus of CPP-Ph with other biomass plastics and representative commercial plastics.

| Plastics    | Tensile strength | Young's modulus | References |
|-------------|------------------|-----------------|------------|
|             | (MPa)            | (GPa)           |            |
| PLA         | 50.0             | 2.5             | 14         |
| PET         | 70.0             | 3.1             | 15         |
| PHB         | 49.2             | 2.1             | 16         |
| PP          | 28.7             | 1.6             | 17         |
| AC-TPA      | 67.0             | 3.2             | 18         |
| PPC         | 71.0             | 3.2             | 19         |
| CNF-imine   | 57.8             | 3.5             | 20         |
| RM paper-20 | 47.9             | 2.3             | 21         |
| LEHL-D      | 79.1             | 1.9             | 22         |
| EN-PL20SA80 | 66.9             | 2.0             | 23         |
| KL-70       | 45.2             | 2.3             | 24         |
| Lignin@TN   | 74.9             | 1.3             | 25         |
| PGCS-100    | 56.5             | 0.4             | 26         |
| CP1-40%     | 47.0             | 2.9             | 27         |
| CS-PI       | 38.4             | 2.8             | 28         |
| CFP/TAV-PI  | 57.9             | 1.3             | 29         |
| CPP-Ph      | 84.5             | 3.7             | This work  |

**Table S2.** Theoretical atom economy of CLE and CPP.

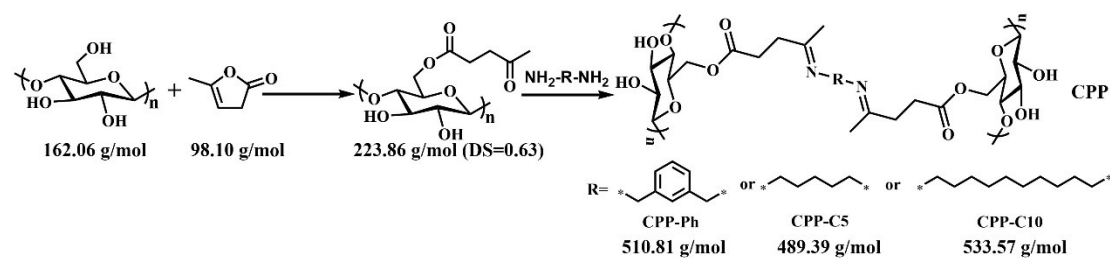

| Step    | Product | Reactants MW <sup>a</sup> (g/mol) | Product MW <sup>b</sup> (g/mol) | AE (%) |
|---------|---------|-----------------------------------|---------------------------------|--------|
| 1       | CLE     | 223.86                            | 223.86                          | 100.00 |
| 2       | CPP-Ph  | 533.52                            | 510.81                          | 95.74  |
| 2       | CPP-C5  | 512.09                            | 489.39                          | 95.57  |
| 2       | CPP-C10 | 556.28                            | 533.57                          | 95.92  |
| Overall | CPP-Ph  | 533.52                            | 510.81                          | 95.74  |
| Overall | CPP-C5  | 512.09                            | 489.39                          | 95.57  |
| Overall | CPP-C10 | 556.28                            | 533.57                          | 95.92  |

a. The  $\alpha$ -AL contribution in the reactants molecular weight was calculated as  $\text{DS} \times M_{\alpha\text{-AL}}$ , where  $\text{DS} = 0.63$ .

b. For CPP, the diamine contribution was calculated as  $\text{DS} \times M_{\text{diamine}}$ , and the product molecular weight was obtained after subtracting  $2 \times \text{DS} \times M_{\text{H}_2\text{O}}$ .

**Table S3.** Material input-output table for the process toward CPP-Ph.

| Step | Input material              | Input type   | Output material | MW (g/mol) | Density (g/mL) | Equiv.                  | Input mol | Input weight (kg) | Output weight (kg) |
|------|-----------------------------|--------------|-----------------|------------|----------------|-------------------------|-----------|-------------------|--------------------|
| 1    | MCC                         | Raw material |                 | 162.06     |                | 1.00                    | 4.548     | 0.737             |                    |
|      | DBU                         | Reagent      |                 | 152.24     |                | 3.00                    | 13.643    | 2.077             |                    |
|      | DMSO                        | Solvent      |                 | 78.13      |                |                         |           | 11.350            |                    |
|      | CO <sub>2</sub>             | Reagent      |                 | 44.01      |                |                         | 53.433    | 2.352             |                    |
|      | $\alpha$ -AL                | Raw material |                 | 98.10      |                | -OH/ $\alpha$ -AL=1/2.5 | 34.108    | 3.346             |                    |
|      | i-PrOH                      | Solvent      |                 |            | 0.78           |                         |           | 34.492            |                    |
|      |                             |              | CLE (DS=0.63)   | 223.86     |                |                         |           |                   | 0.921              |
|      | CLE (DS=0.63)               | Intermediate |                 | 223.86     |                | 1                       | 4.114     | 0.921             |                    |
| 2    | 1,3-bis(aminomethyl)benzene | Raw material |                 | 136.19     |                | 0.5                     | 1.296     | 0.176             |                    |
|      | H <sub>2</sub> O            | Solvent      |                 | 18.00      | 1              |                         |           | 8.289             |                    |
|      |                             |              | CPP-Ph          | 510.81     |                |                         |           |                   | 1                  |

The material inputs were estimated based on a representative CLE preparation batch. CO<sub>2</sub> and H<sub>2</sub>O were included for PMI calculation but excluded from the total *E*-factor calculation. At larger scales, the used CO<sub>2</sub> could potentially be recycled, as it is released during the derivatization reaction. H<sub>2</sub>O was used as a processing solvent and removed by evaporation during film formation. The treatment of CO<sub>2</sub> and H<sub>2</sub>O described above also applies to the following tables.

**Table S4.** *E*-factor analysis of the process toward CPP-Ph.

| Step  | Raw material (kg) | Spent reagent (excl. CO <sub>2</sub> ) (kg) | Solvent losses (excl. water) (kg) | Product (kg) | <i>E</i> -factor contribution (kg waste/kg final product) |
|-------|-------------------|---------------------------------------------|-----------------------------------|--------------|-----------------------------------------------------------|
| 1     | 4.083             | 0.270                                       | 3.053                             | 0.921        | 6.485                                                     |
| 2     | 1.097             |                                             |                                   | 1.00         | 0.097                                                     |
| Total |                   |                                             |                                   | 1.00         | 6.582                                                     |

**Table S5.** PMI analysis of the process toward CPP-Ph.

| Entry   | Raw material (kg) | Reagent (kg) | Solvent (kg) | Product (kg) | PMI (kg/kg) |
|---------|-------------------|--------------|--------------|--------------|-------------|
| Overall | 4.259             | 4.429        | 54.131       | 1.00         | 62.819      |

**Table S6.** Material input-output table for the process toward CPP-C5.

| Step | Input material     | Input type   | Output material | MW (g/mol) | Density (g/mL) | Equiv.                  | Input mol | Input weight (kg) | Output weight (kg) |
|------|--------------------|--------------|-----------------|------------|----------------|-------------------------|-----------|-------------------|--------------------|
| 1    | MCC                | Raw material |                 | 162.06     |                | 1.00                    | 4.745     | 0.769             |                    |
|      | DBU                | Reagent      |                 | 152.24     |                | 3.00                    | 14.235    | 2.167             |                    |
|      | DMSO               | Solvent      |                 | 78.13      |                |                         |           | 11.843            |                    |
|      | CO <sub>2</sub>    | Reagent      |                 | 44.01      |                |                         | 55.753    | 2.454             |                    |
|      | $\alpha$ -AL       | Raw material |                 | 98.10      |                | -OH/ $\alpha$ -AL=1/2.5 | 35.589    | 3.491             |                    |
|      | i-PrOH             | Solvent      |                 |            |                | 0.78                    |           | 35.989            |                    |
|      |                    |              | CLE (DS=0.63)   | 223.86     |                |                         |           |                   | 0.961              |
| 2    | CLE (DS=0.63)      | Intermediate |                 | 223.86     |                | 1                       | 4.293     | 0.961             |                    |
|      | 1,5-diaminopentane | Raw material |                 | 102.18     |                | 0.5                     | 1.352     | 0.138             |                    |
|      | H <sub>2</sub> O   | Solvent      |                 | 18.00      | 1              |                         |           | 8.649             |                    |
|      |                    |              | CPP-C5          | 489.39     |                |                         |           |                   | 1                  |

**Table S7.** E-factor analysis of the process toward CPP-C5.

| Step  | Raw material (kg) | Spent reagent (excl. CO <sub>2</sub> ) (kg) | Solvent losses (excl. water) (kg) | Product (kg) | E-factor contribution (kg waste/kg final product) |
|-------|-------------------|---------------------------------------------|-----------------------------------|--------------|---------------------------------------------------|
| 1     | 4.260             | 0.282                                       | 3.185                             | 0.961        | 6.766                                             |
| 2     | 1.099             |                                             |                                   | 1.000        | 0.099                                             |
| Total |                   |                                             |                                   | 1.000        | 6.865                                             |

**Table S8.** PMI analysis of the process toward CPP-C5.

| Entry   | Raw material (kg) | Reagent (kg) | Solvent (kg) | Product (kg) | PMI (kg/kg) |
|---------|-------------------|--------------|--------------|--------------|-------------|
| Overall | 4.398             | 4.621        | 56.481       | 1.00         | 65.500      |

**Table S9.** Material input-output table for the process toward CPP-C10.

| Step | Input material     | Input type   | Output material | MW (g/mol) | Density (g/mL) | Equiv.                  | Input mol | Input weight (kg) | Output weight (kg) |
|------|--------------------|--------------|-----------------|------------|----------------|-------------------------|-----------|-------------------|--------------------|
| 1    | MCC                | Raw material |                 | 162.06     |                | 1.00                    | 4.350     | 0.705             |                    |
|      | DBU                | Reagent      |                 | 152.24     |                | 3.00                    | 13.051    | 1.987             |                    |
|      | DMSO               | Solvent      |                 | 78.13      |                |                         |           | 10.857            |                    |
|      | CO <sub>2</sub>    | Reagent      |                 | 44.01      |                |                         | 51.113    | 2.249             |                    |
|      | $\alpha$ -AL       | Raw material |                 | 98.10      |                | -OH/ $\alpha$ -AL=1/2.5 | 32.627    | 3.201             |                    |
|      | i-PrOH             | Solvent      |                 |            |                | 0.78                    |           | 32.994            |                    |
|      |                    |              | CLE (DS=0.63)   | 223.86     |                |                         |           |                   | 0.881              |
| 2    | CLE (DS=0.63)      | Intermediate |                 | 223.86     |                | 1                       | 3.935     | 0.881             |                    |
|      | 1,10-decanediamine | Raw material |                 | 172.31     |                | 0.5                     | 1.240     | 0.214             |                    |
|      | H <sub>2</sub> O   | Solvent      |                 | 18.00      | 1              |                         |           | 7.929             |                    |
|      |                    |              |                 | CPP-C10    | 533.57         |                         |           |                   |                    |

**Table S10.** E-factor analysis of the process toward CPP-C10.

| Step  | Raw material (kg) | Spent reagent (excl. CO <sub>2</sub> ) (kg) | Solvent losses (excl. water) (kg) | Product (kg) | E-factor contribution (kg waste/kg final product) |
|-------|-------------------|---------------------------------------------|-----------------------------------|--------------|---------------------------------------------------|
| 1     | 3.906             | 0.258                                       | 2.920                             | 0.881        | 6.203                                             |
| 2     | 1.095             |                                             |                                   | 1.000        | 0.095                                             |
| Total |                   |                                             |                                   | 1.000        | 6.298                                             |

**Table S11.** PMI analysis of the process toward CPP-C10.

| Entry   | Raw material (kg) | Reagent (kg) | Solvent (kg) | Product (kg) | PMI (kg/kg) |
|---------|-------------------|--------------|--------------|--------------|-------------|
| Overall | 4.120             | 4.236        | 51.780       | 1.00         | 60.136      |

**Table S12.** Carbon-source composition and BRC values of CPP.

| Sample  | MCC-derived carbon | $\alpha$ -AL-derived carbon <sup>a</sup> | Diamine-derived carbon <sup>b</sup> | Bio-based carbon | Fossil-based carbon | Total carbon | BRC%   |
|---------|--------------------|------------------------------------------|-------------------------------------|------------------|---------------------|--------------|--------|
| CPP-Ph  | 12.00              | 6.30                                     | 5.04                                | 18.30            | 5.04                | 23.34        | 78.40  |
| CPP-C5  | 12.00              | 6.30                                     | 3.15                                | 21.45            | 0.00                | 21.45        | 100.00 |
| CPP-C10 | 12.00              | 6.30                                     | 6.30                                | 24.60            | 0.00                | 24.60        | 100.00 |

DS represents the degree of substitution of CLE, which was determined to be 0.63.

a.  $\alpha$ -AL-derived carbon was calculated as  $2 \times 5 \times DS$ , where 5 is the number of carbon atoms introduced by  $\alpha$ -AL.

b. Diamine-derived carbon was calculated as  $n \times DS$ , where n is the number of carbon atoms in the diamine.

**Table S13.** Estimated energy consumption of each processing step for CPP preparation.

| Step  | Process                                  | Equipment             | Rated power,<br><i>P</i> (kW) | Operation<br>time, <i>t</i> (h) | Energy<br>consumption,<br><i>E</i> (kWh) |
|-------|------------------------------------------|-----------------------|-------------------------------|---------------------------------|------------------------------------------|
| 1     | Dissolution of cellulose                 | Reactor               | 1.000                         | 3.000                           | 3.000                                    |
|       | Stirring during dissolution              | Mechanical<br>stirrer | 0.025                         | 3.000                           | 0.075                                    |
|       | Transesterification                      | Reactor               | 1.000                         | 1.000                           | 1.000                                    |
|       | Stirring during<br>transesterification   | Mechanical<br>stirrer | 0.025                         | 1.000                           | 0.025                                    |
|       | Vacuum filtration                        | Vacuum<br>pump        | 0.180                         | 0.500                           | 0.090                                    |
|       | Vacuum drying                            | Vacuum oven           | 0.800                         | 48.000                          | 38.400                                   |
| 2     | Dissolution/mixing of CLE and<br>diamine | Stirrer               | 0.005                         | 0.200                           | 0.001                                    |
|       | Vacuum drying                            | Vacuum oven           | 0.800                         | 6.000                           | 4.800                                    |
| Total |                                          |                       |                               |                                 | 47.391                                   |

## References

1. M. Pei, X. Peng, Y. Shen, Y. Yang, Y. Guo, Q. Zheng, H. Xie and H. Sun, *Green Chem.*, 2020, **22**, 707-717.
2. A. J. Huertas-Alonso, D. J. González-Serrano, M. Salgado-Ramos, M. Hadidi, P. Sánchez-Verdú, B. Cabañas, C. J. Chuck, J. H. Clark and A. Moreno, *ChemSusChem*, 2025, **18**, e202402508.
3. A. D. Curzons, D. N. Mortimer, D. J. C. Constable and V. L. Cunningham, *Green Chem.*, 2001, **3**, 1-6.
4. R. A. Sheldon, *Green Chem.*, 2007, **9**, 1273-1283.
5. R. A. Sheldon, *Chem. Commun.*, 2008, 3352-3365.
6. R. A. Sheldon, *Green Chem.*, 2017, **19**, 18-43.
7. J. Wolfs and M. A. R. Meier, *Green Chem.*, 2021, **23**, 4410-4420.
8. A. Bahuguna, S. Kumar, V. Sharma, K. L. Reddy, K. Bhattacharyya, P. C. Ravikumar and V. Krishnan, *ACS Sustain. Chem. Eng.*, 2017, **5**, 8551-8567.
9. C. Jimenez-Gonzalez, C. S. Ponder, Q. B. Broxterman and J. B. Manley, *Org. Process Res. Dev.*, 2011, **15**, 912-917.
10. E. Skliutas, M. Lebedevaite, S. Kasetaitė, S. Rekštyte, S. Lileikis, J. Ostrauskaite and M. Malinauskas, *Sci. Rep.*, 2020, **10**, 9758.
11. M. Lebedevaite, V. Talacka and J. Ostrauskaite, *J. Appl. Polym. Sci.*, 2021, **138**, 50233.
12. J. Silk, S. Beitone, M. Hoque, C. Ternon, D. Evrard and D. Riassetto, *Green Chem.*, 2026, **28**, 2429-2439.
13. D. Cespi, *Green Chem.*, 2024, **26**, 9554-9568.
14. K. Van de Velde and P. Kiekens, *Polym. Test.*, 2002, **21**, 433-442.
15. N. E. Zander, M. Gillan and R. H. Lambeth, *Addit. Manuf.*, 2018, **21**, 174-182.
16. P. Vostrejs, D. Adamcová, M. D. Vaverková, V. Enev, M. Kalina, M. Machovsky, M. Sourková, I. Marova and A. Kovalcik, *RSC Adv.*, 2020, **10**, 29202-29213.
17. H. Junaedi, M. Baig, A. Dawood, E. Albahkali and A. Almajid, *Materials*, 2022, **15**, 7568.
18. G. Zhou, H. Zhang, Z. Su, X. Zhang, H. Zhou, L. Yu, C. Chen and X. Wang, *Adv. Mater.*, 2023, **35**, 2301398.
19. Z. Su, S. Huang, Y. Wang, H. Ling, X. Yang, Y. Jin, X. Wang and W. Zhang, *J. Mater. Chem. A*, 2020, **8**, 14082-14090.
20. M. E. Lamm, K. Li, K. Copenhaver, P. V. Kelly, H. Senkum, H. Tekinalp, W. M. Gramlich and S. Ozcan, *ACS Appl. Polym. Mater.*, 2022, **4**, 7674-7684.
21. P. H. Sun, S. H. Wang, Z. Huang, L. Zhang, F. H. Dong, X. Xu and H. Liu, *Green Chem.*, 2022, **24**, 7519-7530.
22. K. F. Huang, S. Q. Ma, S. Wang, Q. Li, Z. J. Wu, J. C. Liu, R. Liu and J. Zhu, *Green Chem.*, 2019, **21**, 4964-4970.
23. S. Zhao, X. N. Huang, A. J. Whelton and M. M. Abu-Omar, *ACS Sustain. Chem. Eng.*, 2018, **6**, 10628-10636.
24. W. Q. Zhang, B. B. Wang, X. W. Xu, H. Z. Feng, K. Z. Hu, Y. Su, S. C. Zhou, J. Zhu, G. S. Weng and S. Q. Ma, *Green Chem.*, 2022, **24**, 9659-9667.
25. M. A. Taher, K. M. F. Hasan and J. Zhu, *J. Appl. Polym. Sci.*, 2024, **141**, e55307.
26. N. N. Zhang, X. J. Pan, A. Q. Xi, W. P. Chen, T. Huang and Y. N. Zeng, *Polym. Chem.*, 2024, **15**, 3287-3299.
27. L. Y. Lin, Z. P. Su, H. S. Zhang, G. W. Zhou, H. N. Zhou, J. L. Ren, X. Y. Wang, C. F. Liu and X.

H. Wang, *Carbohydr. Polym.*, 2022, **291**, 119479.

28. X. Q. Zhang, L. Y. Lin, H. A. Zhou, G. W. Zhou and X. H. Wang, *J. Hazard. Mater.*, 2024, **465**, 133030.

29. X. Q. Zhang, L. Y. Lin, H. N. Zhou, J. Zou, W. Zhao, G. W. Zhou, Z. P. Lei and X. H. Wang, *Carbohydr. Polym.*, 2025, **358**, 123523.
